# Supplementary material for: Pd-P nanoparticles supported on PxOy-incorporated carbon nanotubes for enhanced methanol oxidation in an alkaline medium
Source: Royal Society of Chemistry journal article supplement (doi:10.1039/c7cp04540a), 2017-01-01
Supplement: c7cp04540a1.pdf [file c7cp04540a1.pdf]

## Supporting Information

Pd-P nanoparticles supported on  $P_xO_y$ -incorporated carbon nanotubes  
for enhanced methanol oxidation in alkaline medium

Ya'nan Xie,<sup>a</sup> Weizhen Yu,<sup>a</sup> Juan Wang,<sup>a</sup> Yifei Wu,<sup>a</sup> Shuo Niu,<sup>a</sup> Wenyao Guo,<sup>a</sup> Tsungwu Lin<sup>b</sup> and  
Lidong Shao<sup>\*a</sup>

<sup>a</sup> Shanghai Key Laboratory of Materials Protection and Advanced Materials in Electric Power,  
Shanghai University of Electric Power, Shanghai 200090, China. E-mail:  
lidong.shao@shiep.edu.cn.

<sup>b</sup> Department of Chemistry, Tunghai University, No. 181, Sec. 3, Taichung Port Rd., Taichung City  
40704, Taiwan.

## 1. Experimental

### 1.1 preparation of Pd-P/PSCNTs、 Pd-P/LPCNTs

Pristine carbon nanotubes (PSCNTs) were purchased from Pyrograf Products Inc. (Ohio, USA). LPCNTs were obtained by heating 50 mg OCNTs with 0.663 g sodium hypophosphite ( $\text{NaH}_2\text{PO}_2$ ) at 600 °C under He gas.

Sodium citrate (0.22 g) was dissolved in water (10 mL), and a solution of  $\text{PdCl}_2$  (2.66 mL, 0.056 M) in 0.27 M aqueous NaCl was added. The pH value was adjusted to 10 using 0.1 M sodium hydroxide, followed by addition of PSCNTs or LPCNTs (60 mg). After 30-min sonication, aqueous  $\text{NaH}_2\text{PO}_2$  (10 mL, 0.1 M) was dropwise added to the slurry under vigorous stirring at a rate of 0.5 mL/min. After being continuously stirred at 80 °C for 4 h under reflux, the resulting suspension was filtered, and the solids were washed with distilled water and vacuum-dried at 70 °C for 7 h to obtain Pd-P/PSCNTs or Pd-P/LPCNTs with 20 wt.% Pd loading theoretically.

### 1.2 Preparation of Pd/PCNTs and Pd/OCNTs

242.08  $\mu\text{L}$   $\text{Pd}(\text{NO}_3)_2$  (Sigma-Aldrich) were added to 10 mL of ethanol containing 50 mg PCNTs or OCNTs under sonication. The solvent was then removed through magnetic stirring at 45 °C. Finally, the collected powder was annealed in a tube furnace at 250 °C under a He/ $\text{H}_2$  atmosphere to produce Pd/PCNTs and Pd/OCNTs catalysts with 20 wt.% Pd loading theoretically.

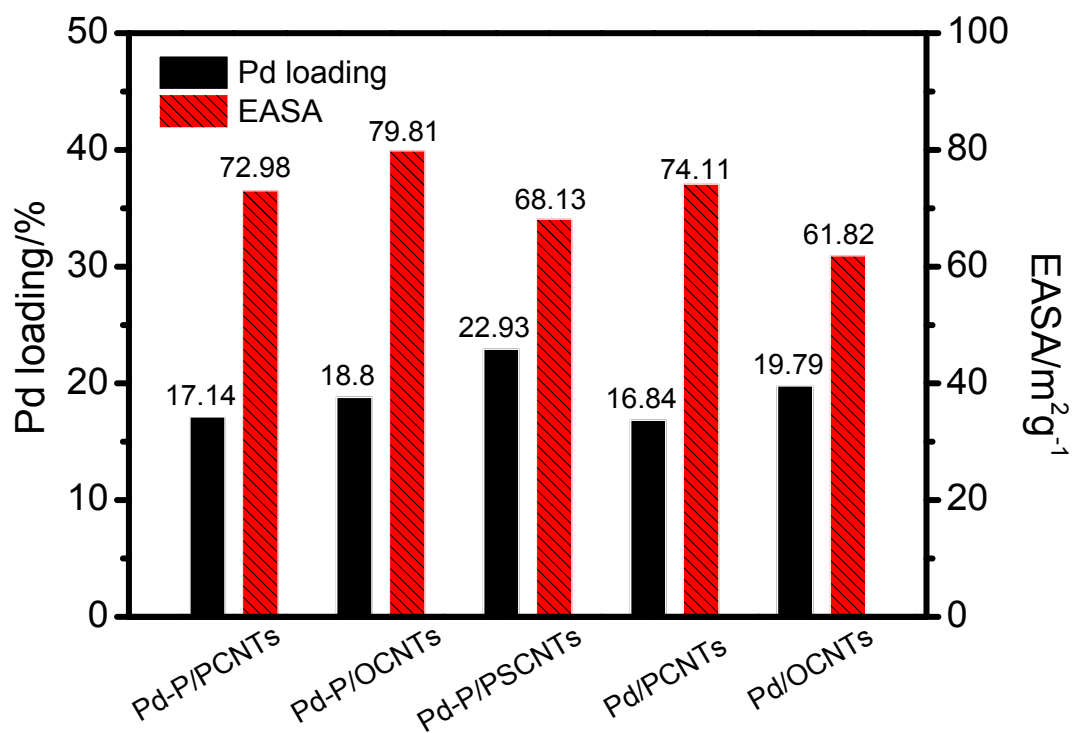

Figure S1. Histogram of Pd loadings and EASAs of Pd-P/PCNTs, Pd-P/OCNTs, Pd-P/PSCNTs, Pd/PCNTs and Pd/OCNTs.

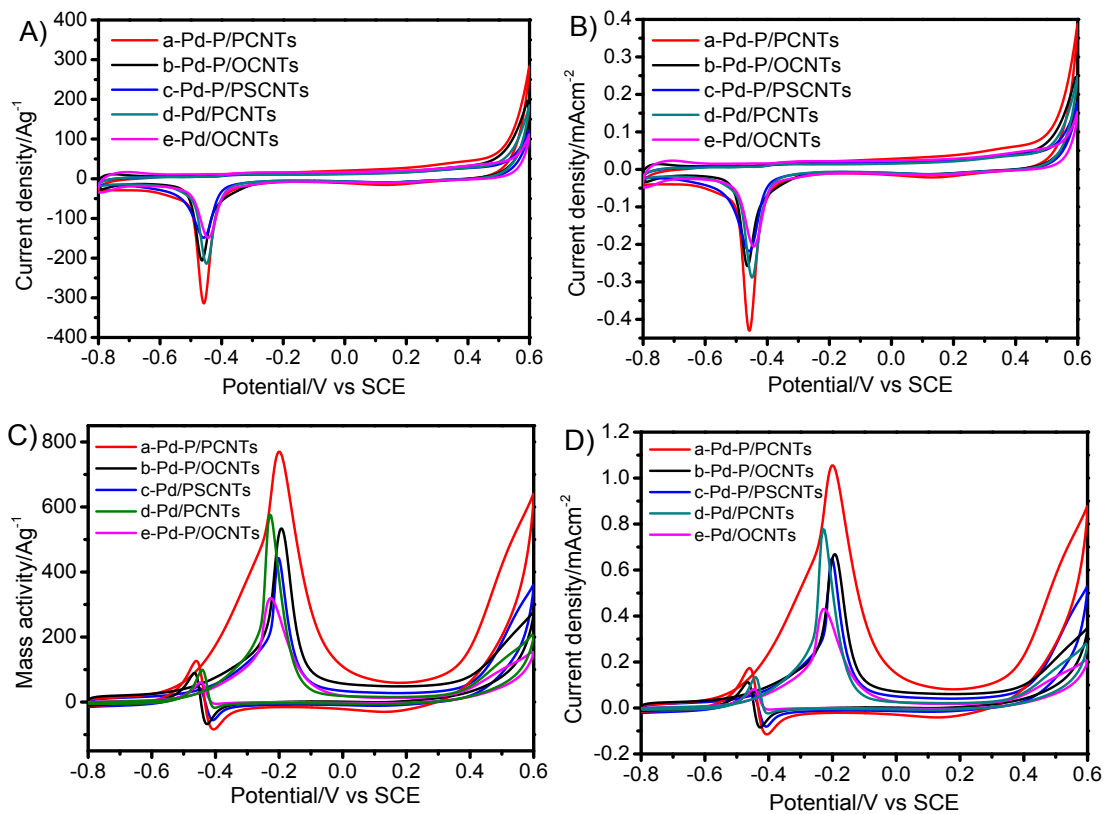

Figure S2. CV curves of (a) Pd-P/PCNTs, (b) Pd-P/OCNTs, (c) Pd-P/PSCNTs, (d) Pd/PCNTs and (e) Pd/OCNTs in 0.5 M NaOH with mass-normalized current (A) and EASA-normalized current (B); in 0.5 M NaOH + 1 M CH<sub>3</sub>OH with mass-normalized current (C) and EASA-normalized current (D) at a scan rate of 50 mV s<sup>-1</sup>.

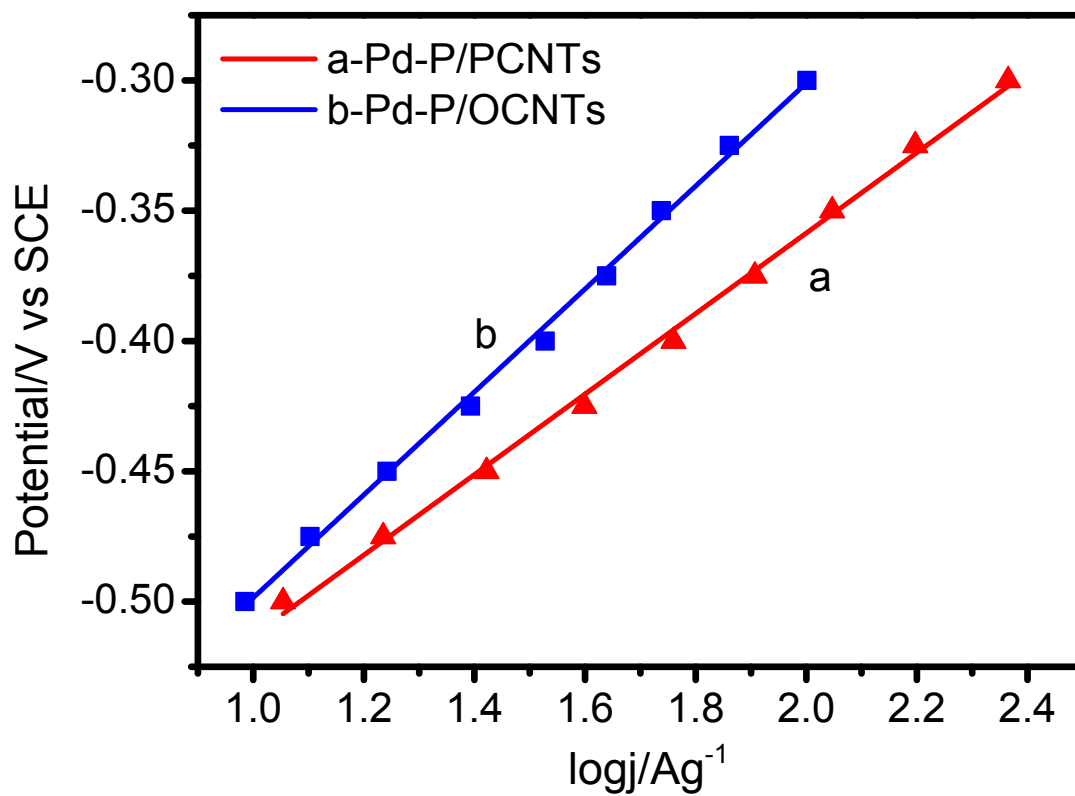

Figure S3. Tafel plots for methanol oxidation on (a) Pd-P/PCNTs and (b) Pd-P/OCNTs in 0.5 M NaOH + 1 M CH<sub>3</sub>OH solution.

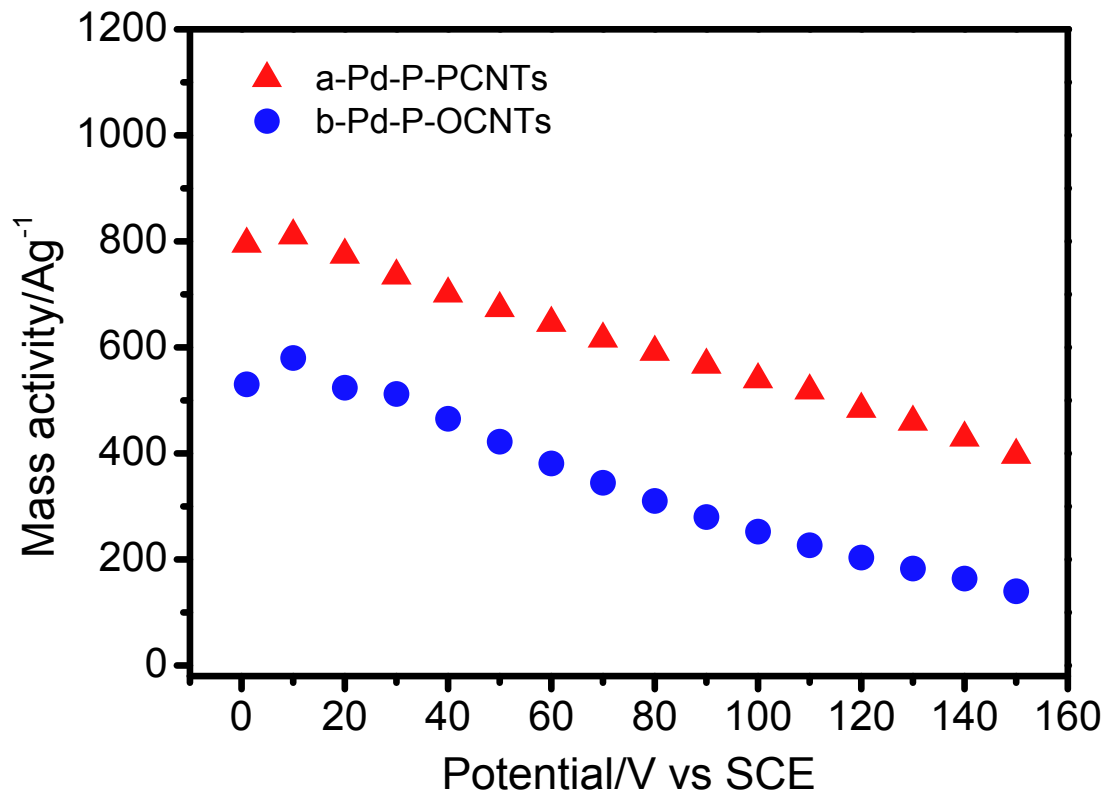

Figure S4. Scatter plot of forward peak current density vs. cycle number in 0.5 M NaOH + 1 M CH<sub>3</sub>OH of (a) Pd-P/PCNTs and (b) Pd-P/OCNTs.

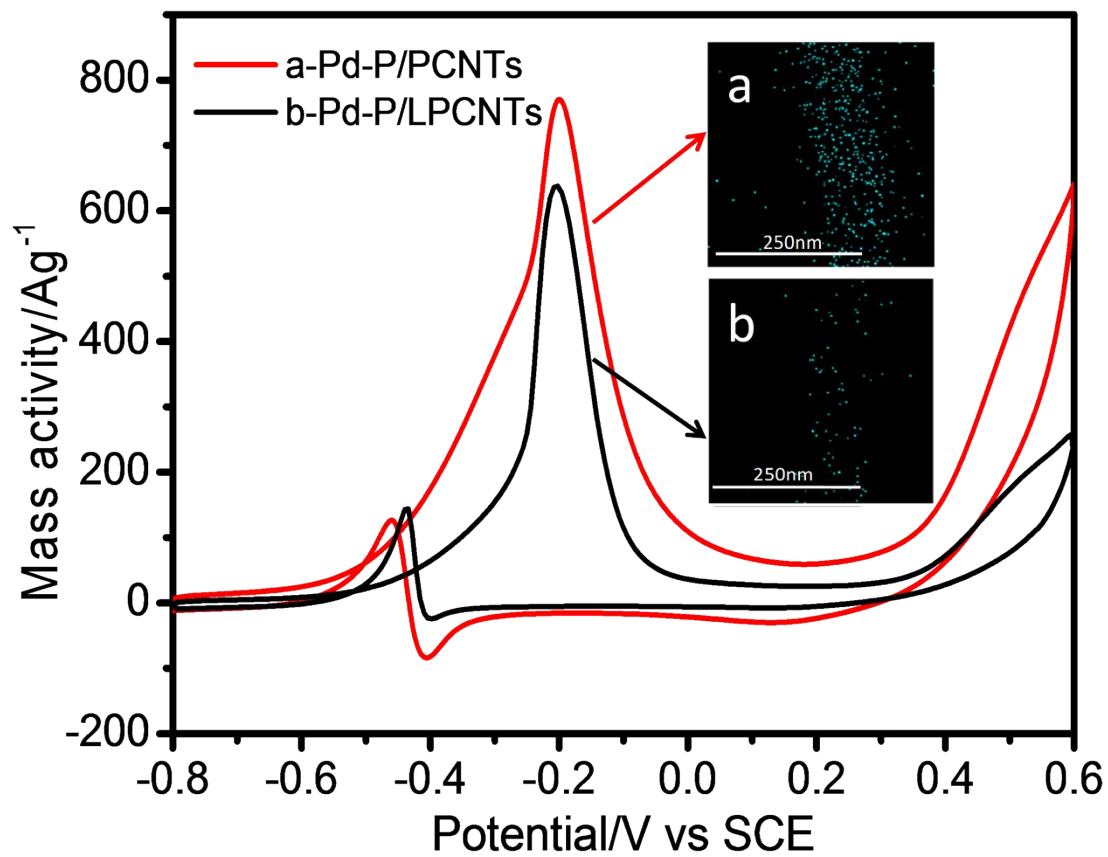

Figure S5. CV curves of Pd-P/PCNTs and Pd-P/LPCNTs in 0.5 M NaOH + 1 M CH<sub>3</sub>OH at a scan rate of 50 mV s<sup>-1</sup> with the insets of EDX mapping of P of (a) PCNTs and (b) LPCNTs.

Table S1. Comparison of various catalysts with EASA, mass activity and specific activity in this study and reported Pd-based catalysts.

| Working Electrode               | Testing Conditions                 | EASA (cm <sup>2</sup> mg <sup>-1</sup> ) | Mass Activity (mA mg <sup>-1</sup> ) | Specific Activity (mA cm <sup>-1</sup> ) | Reference |
|---------------------------------|------------------------------------|------------------------------------------|--------------------------------------|------------------------------------------|-----------|
| Pd-P/PCNTs                      | 0.5M NaOH<br>1M CH <sub>3</sub> OH | 729.8                                    | 772.67                               | 1.06                                     | This work |
| Pd-P/OCNTs                      | 0.5M NaOH<br>1M CH <sub>3</sub> OH | 798.1                                    | 533.51                               | 0.67                                     | This work |
| Pd/PCNTs                        | 0.5M NaOH<br>1M CH <sub>3</sub> OH | 741.1                                    | 574.02                               | 0.77                                     | This work |
| Ni@Pd/MWCNTs                    | 0.5M NaOH<br>1M CH <sub>3</sub> OH | 1762.0                                   | 770.7                                | 0.44                                     | [1]       |
| Pd-Ag(1:1)/CNTs                 | 1M KOH<br>1M CH <sub>3</sub> OH    | 1.14cm <sup>2</sup>                      | —                                    | 0.950                                    | [2]       |
| 8nm Pd-Ni-P NPs                 | 0.5M KOH<br>1M CH <sub>3</sub> OH  | 629.0                                    | 360.00                               | 0.57                                     | [3]       |
| 17nm Pd-Ni-P NPs                | 0.5M KOH<br>1M CH <sub>3</sub> OH  | 283.0                                    | 170.00                               | 0.60                                     | [3]       |
| Pd <sub>2</sub> /P <sub>1</sub> | 1M KOH<br>1M CH <sub>3</sub> OH    | 507.01                                   | 844.74                               | 1.67                                     | [4]       |
| Pd/polypyrrole-graphene         | 0.5M NaOH<br>1M CH <sub>3</sub> OH | 418.0                                    | 359.8                                | 0.86                                     | [5]       |

### Reference

- [1] Y. C. Zhao, X. L. Yang, J. N. Tian, F. Y. Wang, L. Zhan, *International Journal of Hydrogen Energy*, 2010, **35**, 3249-3257.
- [2] Y. Wang, Z. M. Sheng, H. B. Yang, S. P. Jiang, *International Journal of Hydrogen Energy*, 2010, **35**, 10087-10093.
- [3] M. Zhao, K. Abe, S. I. Yamaura, Y. Yamamoto, N. Asao, *Chemistry of Materials*, 2014, **26**, 1056-1061.
- [4] K. Zhang, C. Q. Wang, D. Bin, J. Wang, B. Yan, Y. Shiraishi, Y. Dou, *Catalysis Science & Technology*, 2016, **6**, 6441-6447.
- [5] Y. C. Zhao, L. Zhan, J. N. Tian, S. L. Nie, Z. Ning, *Electrochimica Acta*, 2011, **56**, 1967-1972.
